# Supplementary material
Source: PubMed Central journal article supplement (PMC3164952)
Supplement: NIHMS63213-supplement-1si20060120_12.pdf [file NIHMS63213-supplement-1si20060120_12.pdf]

# Minimization and Optimization of Designed $\beta$ Hairpin Folds

Niels H. Andersen\*, Katherine A. Olsen, R. Matthew Fesinmeyer, Xu Tan, F. Michael Hudson, Lisa A. Eidenschink, Shabnam R. Farazi

*Department of Chemistry, University of Washington, Seattle WA 98195*

## Supporting Material

**Figure 1S.** The backbone CSD comparison of HP5W, (T3V)-HP6, HP6, and Ac-HP6 over the shared portions of the strands -Y(T/V)W-loop-KWTV sequence:  $H_{\alpha}$  (A) and  $H_N$  (B) in the two panels. The series presented represents a decreasing hairpin stability. The dramatic differences in  $H_{\alpha}$  CSDs at the Trp and Lys are due to the loop geometry change when NPATG of HP5W is replaced by SNG in the HP6 peptides.

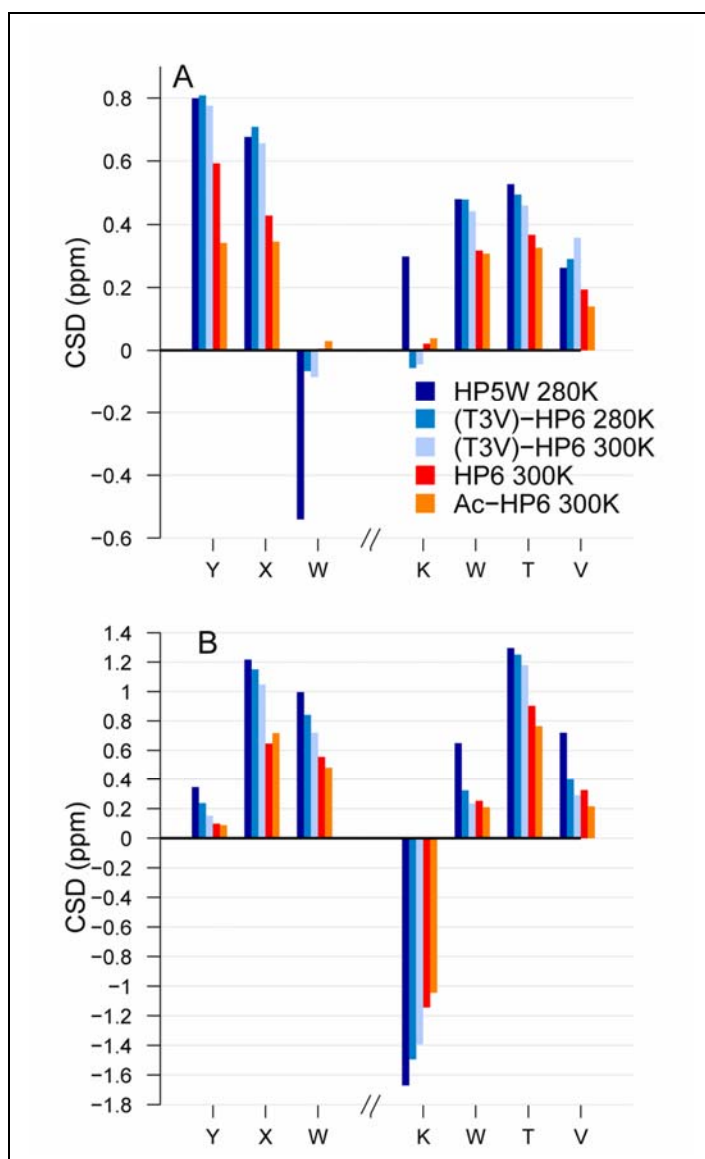

**Figure 2S.** The backbone CSD comparison of HP5W, HP7, and two HP7 mutants over the shared portions of the -TW(NPATGK)WT- sequence:  $H\alpha$  (A) and  $H_N$  (B) in the two panels. At each residue the data is shown in the following order: HP5W at 280K, HP7 at 280 and 320K (illustrating a modest degree of structure melting at the highest temperature), (G8A)-HP7 at 320K (less folded), and (N4A)-HP7 at 298K (much less folded even at this lower temperature). Additional data, including CD melting data, has previously been reported for HP5W.<sup>1</sup> All of the sites with large CSDs, whether positive or negative, show the same order (decreasing from left to right) of fold populations for this series of peptides. The anomaly at  $H\alpha$  of residue 10 is due to the G10A mutation.

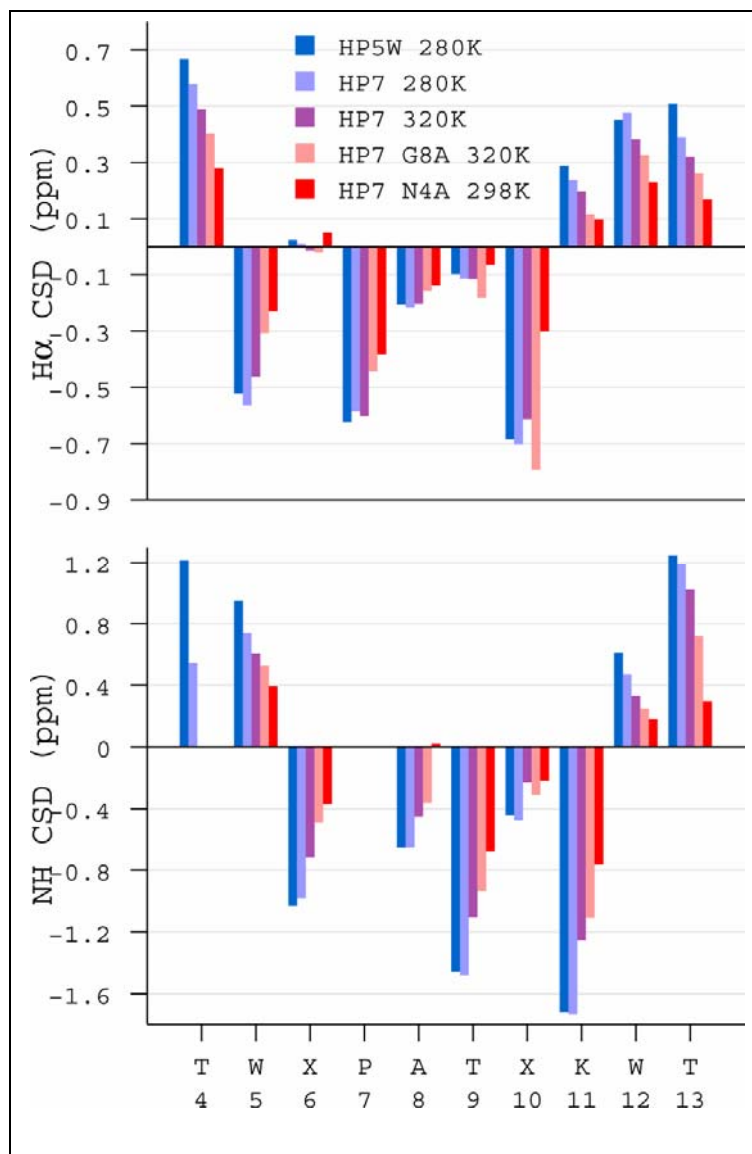

## NMR Shift Validation of HP5W4 and trpzip4 structure ensembles

We performed a more complete examination of the extent to which the distinctive NMR structure ensembles of trpzip4 *versus* HP5W4 and HP7 predict the chemical shifts observed, with particular attention to the sites along the Trp indole rings that experience ring current shifts, Table 1S. As discussed earlier, while HP5W4 and trpzip4 assume exceedingly similar turn geometries and turn-neighboring Trp sidechain interactions, the packing of the W3 and 14 (HP5W4 numbering used throughout this discussion) sidechains differ. This difference, observed in the NMR structure ensembles, is reinforced in the chemical shifts.

Table 1S: Chemical Shifts for Trp hydrogens displaying upfield ring current shifts. Hε3 is included for all residues since this shift is particularly diagnostic of the cross-strand ‘EtF’ interaction geometry. Experimental shifts that correspond to CSDs greater than 0.7ppm are highlighted with the observed shift in bold. Instances in which calculated shifts and the observed values deviate by greater than 0.7 ppm are highlighted with the calculated value italicized.

| Site       | trpzip4           |                    | HP5W4             |                  | HP7 <sup>4</sup>  |           | δ(ref) <sup>5</sup> |
|------------|-------------------|--------------------|-------------------|------------------|-------------------|-----------|---------------------|
|            | Obs. <sup>1</sup> | Calc. <sup>2</sup> | Obs. <sup>3</sup> | Calc.            | Obs. <sup>3</sup> | Calc.     |                     |
| Trp 3 Hε3  | 7.60              | 7.58±0.07          | <b>6.31</b>       | 5.85±0.37        | N/A               | N/A       | 7.62                |
| Trp 3 Hz3  | 7.23              | 7.21±0.06          | 6.77              | <i>4.68±0.26</i> | N/A               | N/A       | <i>7.12</i>         |
| Trp 3 Hz2  | 7.20              | 7.23±0.06          | 7.15              | 6.97±0.15        | N/A               | N/A       | <i>7.46</i>         |
| Trp 3 Hδ1  | 7.25              | 7.31±0.05          | 6.93              | 6.45±0.20        | N/A               | N/A       | <i>7.22</i>         |
| Trp 5 Hε3  | <b>4.97</b>       | 5.06±0.05          | <b>5.53</b>       | 4.82±0.18        | <b>5.328</b>      | 4.84±0.10 | 7.62                |
| Trp 5 Hz3  | <b>6.27</b>       | 6.37±0.03          | 6.62              | 6.31±0.11        | <b>6.418</b>      | 6.57±0.09 | <i>7.12</i>         |
| Trp 5 Hz2  | 7.21              | 7.22±0.03          | 7.32              | 7.16±0.02        | 7.279             | 7.24±0.01 | <i>7.46</i>         |
| Trp 5 Hδ1  | 6.87              | 6.84±0.03          | <b>6.47</b>       | 6.80±0.02        | 6.684             | 6.76±1.03 | <i>7.22</i>         |
| Trp 12 Hε3 | 7.58              | 7.55±0.06          | <b>6.90</b>       | 5.87±0.19        | 7.380             | 7.21±0.07 | 7.62                |
| Trp 12 Hz3 | 7.21              | 7.21±0.05          | 7.10              | 6.80±0.15        | 7.161             | 7.14±0.06 | <i>7.12</i>         |
| Trp 12 Hδ1 | 7.17              | 7.31±0.04          | 7.42              | 7.29±0.05        | 7.557             | 7.47±0.02 | <i>7.22</i>         |
| Trp 14 Hε3 | <b>5.21</b>       | 5.23±0.07          | <b>6.74</b>       | <i>7.60±0.09</i> | N/A               | N/A       | 7.62                |
| Trp 14 Hz3 | 6.40              | 6.48±0.05          | 6.98              | 6.96±0.08        | N/A               | N/A       | <i>7.12</i>         |
| Trp 14 Hz2 | 7.25              | 7.21±0.03          | 7.23              | 7.00±0.10        | N/A               | N/A       | <i>7.46</i>         |

<sup>1</sup> The literature data<sup>2</sup> is reported at 288 K. <sup>2</sup> The remarkable match between theoretical and calculated values is presumably related to the Cochran’s use of molecular dynamics refinement with AMBER, on which Case’s shift-estimation program<sup>3</sup> is based. <sup>3</sup> Observed shifts are at 280 K. <sup>4</sup> Trp 5 and 12 of HP5W4 correspond to Trp 3 and 10 of HP7. <sup>5</sup> Unfolded reference shift values are those observed in this laboratory and are within 0.06 ppm the values reported by several groups<sup>4</sup>. The 7.62 ppm value for Hε3 is also the most downfield observation for unfolded control peptides from the present study.

The W5 sidechain is the only one expected to exhibit identical chemical shift deviations over the three peptides. Throughout, the H $\epsilon$ 3, Hz3, H $\delta$ 1, and Hz2 positions of W5 display diagnostic upfield deviations (of decreasing magnitude in the order listed). In all three cases, chemical shifts calculated based on the NMR ensemble structures using Shifts 4.1<sup>3</sup> duplicate the pattern and match the observed values to a reasonable degree. HP7 and trpzip4 display an exceedingly good match between the calculated and observed values. In the case of trpzip4, this may be the result of using chemical shifts in the ensemble calculation – the procedure used for HP5W4 and HP7 was purely based on nOe's.

The chemical shifts of the Trp immediately following the turn (W12) are not consistent across the three sequences, reflecting the differing orientations of W3 in trpzip4 and HP5W4 and the lack of the terminal pair of tryptophans in HP7. In trpzip4, the CSDs at W12 are very small. In HP5W4, the largest structuring shift (upfield) at W12 is at H $\epsilon$ 3 and, an even larger upfield shift, is predicted by the NMR ensemble. The observed upfield shift at this site is greatly diminished in HP7, indicating that the effect seen in HP5W4 reflects the W3 ring current. The downfield shift at H $\delta$ 1 cannot be attributed to W3, since it also appears in HP7.

Given the differences in deviations observed for W12 of HP5W4 and trpzip4, it is not surprising that those observed for W3 and W14 also do not match. One of the largest deviations observed for trpzip4, the 2.37 ppm upfield shift of W14 H $\epsilon$ 3, is not replicated in our construct, which moves upfield only 0.84 ppm. This residual upfield shift is not predicted by our structure ensemble. The 1.31 ppm upfield shift of W3 H $\epsilon$ 3 in our construct is strikingly different from the near coil value reported for trpzip4 and this shift is predicted by the ensemble. Calculated chemical shift values for HP5W4 do not consistently match the observed values. The largest predicted CSD is at W3 Hz3; in fact, the NMR ensemble would imply that W3 H $\epsilon$ 3 should have the largest CSD of all the indole ring CH sites. Hardly any structuring shift is observed at W3 Hz3.

The small standard errors of the HP5W4 shift predictions indicate that the indole ring orientations are well converged in the NMR ensemble. This is probably a case of false convergence in the case of W3 and W14: for example the residual upfield shift at H $\epsilon$ 3 of W14 likely implies that the T-orientation of W3 and W14 seen in trpzip4 is also partially populated in HP5W4. Nonetheless, the chemical shifts do serve to confirm the differences in the Trp/Trp interactions between trpzip4 and HP5W4 as seen in the nOe-derived structure ensembles and that only the W5/W12 interaction geometry is preserved throughout this series of peptides.

The  $J_{\alpha\beta}$  coupling constants for the Trp residues of HP7 (and HP5W4) provide additional evidence for a defined cross-strand interaction geometry, using HP5W4 numbering: Trp<sup>5</sup> ( $J_{\alpha\beta 3} = 12.1 \pm 0.8$ ,  $J_{\alpha\beta 2} = 3.5 \pm 0.9$  Hz) and Trp<sup>12</sup> ( $J_{\alpha\beta 3} = 2.4 \pm 0.5$ ,  $J_{\alpha\beta 2} = 11.8 \pm 0.8$  Hz). Exact coupling constants were not derived for the more remote Trp pair of HP5W4, but the 1D spectra and TOCSY indicate  $J_{\alpha\beta}$  values that are moving toward conformationally-averaged norms.

Table 6. The distance restraints employed in generating the NMR ensemble of HP5W4

| Residue1 | Proton | Residue 2 | Proton | d    | d-   | d+   |
|----------|--------|-----------|--------|------|------|------|
| 1        | ha     | 2         | hn     | 2.44 | 0.46 | 0.33 |
| 1        | hb#    | 2         | hn     | 3.38 | 0.74 | 0.53 |
| 1        | hb#    | 14        | he3    | 3.73 | 0.85 | 0.86 |
| 2        | ha     | 3         | hn     | 2.13 | 0.23 | 0.28 |
| 2        | hb#    | 3         | hn     | 3.57 | 0.81 | 0.82 |
| 2        | hg#    | 3         | hn     | 4.49 | 1.09 | 1.04 |
| 2        | hn     | 15        | hn     | 3.27 | 0.72 | 0.52 |
| 3        | ha     | 3         | hn     | 3.47 | 0.78 | 0.59 |
| 3        | hb1    | 3         | hn     | 2.83 | 0.58 | 0.41 |
| 3        | hb2    | 3         | hn     | 2.67 | 0.53 | 0.37 |
| 3        | hd1    | 3         | hn     | 4.16 | 1    | 1.11 |
| 3        | ha     | 4         | hn     | 2.19 | 0.29 | 0.29 |
| 3        | hb1    | 4         | hn     | 4.45 | 1.09 | 1.1  |
| 3        | hb2    | 4         | hn     | 5.39 | 1.39 | 2.08 |
| 3        | he3    | 4         | hn     | 4.88 | 1.23 | 1.67 |
| 3        | hb1    | 12        | hz3    | 4.45 | 1.09 | 1.3  |
| 3        | he3    | 13        | hn     | 5.54 | 1.44 | 2.51 |
| 3        | ha     | 14        | he3    | 4.07 | 0.97 | 1.06 |
| 3        | hb2    | 14        | hh2    | 4.23 | 1.02 | 1.15 |
| 3        | hb2    | 14        | hz3    | 4.09 | 0.98 | 1.07 |
| 3        | he3    | 14        | hn     | 5.31 | 1.37 | 2.17 |
| 3        | hz3    | 14        | he1    | 4.39 | 1.07 | 1.45 |
| 3        | hz3    | 14        | hn     | 4.1  | 0.98 | 1.07 |
| 4        | ha     | 4         | hb     | 3.2  | 0.35 | 0.35 |
| 4        | ha     | 4         | hg2#   | 3.34 | 0.66 | 0.45 |
| 4        | ha     | 4         | hn     | 3.13 | 0.68 | 0.48 |
| 4        | hb     | 4         | hn     | 2.9  | 0.67 | 0.37 |
| 4        | hg2#   | 4         | hn     | 4.73 | 1.1  | 0.93 |
| 4        | ha     | 5         | hn     | 2.11 | 0.21 | 0.28 |
| 4        | hb     | 5         | hn     | 3.74 | 0.87 | 0.69 |
| 4        | hg2#   | 5         | hn     | 3.92 | 0.84 | 0.6  |
| 4        | hb     | 13        | hn     | 5.08 | 1.29 | 1.68 |
| 4        | hb     | 15        | hb#    | 4.79 | 1.2  | 1.58 |
| 4        | hb     | 15        | hg#    | 4.02 | 0.94 | 0.78 |
| 4        | hg2#   | 15        | hb#    | 5.57 | 1.36 | 1.67 |
| 4        | hg2#   | 15        | hg#    | 5.42 | 1.3  | 1.25 |
| 5        | ha     | 6         | hn     | 2.27 | 0.37 | 0.3  |
| 5        | hb2    | 6         | hn     | 4.86 | 1.22 | 1.44 |
| 5        | ha     | 12        | he3    | 4.25 | 1.03 | 1.16 |
| 5        | hb2    | 12        | he1    | 4.65 | 1.16 | 1.45 |
| 5        | hb2    | 12        | he3    | 4.98 | 1.26 | 1.76 |
| 5        | hb2    | 12        | hz2    | 4.1  | 0.98 | 1.07 |
| 5        | hb2    | 12        | hz3    | 4    | 0.95 | 1.01 |
| 5        | he3    | 12        | hd1    | 3.9  | 0.92 | 1.17 |
| 5        | he3    | 12        | hn     | 4.87 | 1.23 | 1.66 |
| 5        | hz3    | 12        | he1    | 3.88 | 0.91 | 1.16 |
| 5        | hz3    | 12        | hn     | 4.86 | 1.22 | 1.65 |

|    |      |    |      |      |      |      |
|----|------|----|------|------|------|------|
| 5  | ha   | 13 | hn   | 5.1  | 1.3  | 1.7  |
| 6  | ha   | 7  | hd1  | 2.68 | 0.53 | 0.37 |
| 6  | ha   | 7  | hd2  | 2.55 | 0.49 | 0.35 |
| 6  | hb1  | 10 | hn   | 4.66 | 1.16 | 1.26 |
| 6  | hb1  | 11 | hn   | 3.54 | 0.81 | 0.61 |
| 6  | hn   | 11 | hn   | 3.82 | 0.89 | 0.73 |
| 7  | ha   | 5  | hd1  | 4.37 | 1.07 | 1.24 |
| 7  | ha   | 5  | he1  | 3.27 | 0.72 | 0.72 |
| 7  | ha   | 5  | hz2  | 3.85 | 0.9  | 0.94 |
| 7  | ha   | 5  | hz3  | 4.77 | 1.2  | 1.56 |
| 7  | hb1  | 5  | hd1  | 4.12 | 0.99 | 1.08 |
| 7  | hb1  | 5  | he1  | 3.46 | 0.78 | 0.78 |
| 7  | hb2  | 5  | he1  | 5.04 | 1.28 | 1.83 |
| 7  | hd1  | 5  | hd1  | 3.35 | 0.74 | 0.75 |
| 7  | hg#  | 5  | hd1  | 3.83 | 0.9  | 1.13 |
| 7  | hg#  | 5  | he1  | 4.07 | 0.97 | 1.25 |
| 7  | ha   | 7  | hb2  | 3.01 | 0.64 | 0.45 |
| 7  | hd1  | 7  | hb1  | 3.57 | 0.81 | 0.62 |
| 7  | hd1  | 7  | hb2  | 4.37 | 1.07 | 1.04 |
| 7  | hd2  | 7  | hb1  | 4.19 | 1.01 | 0.93 |
| 7  | hd2  | 7  | hb2  | 4.12 | 0.99 | 0.88 |
| 7  | ha   | 8  | hn   | 4.05 | 0.97 | 0.84 |
| 7  | hb1  | 8  | hn   | 5.14 | 1.31 | 1.76 |
| 7  | hb2  | 8  | hn   | 3.83 | 0.9  | 0.73 |
| 7  | hd2  | 8  | hn   | 3.06 | 0.65 | 0.46 |
| 7  | hg#  | 8  | hn   | 3.65 | 0.84 | 0.86 |
| 7  | ha   | 10 | hn   | 4.35 | 1.06 | 1.03 |
| 8  | hb#  | 6  | hd21 | 5.29 | 1.27 | 1.26 |
| 8  | hb#  | 6  | hd22 | 4.65 | 1.07 | 0.88 |
| 8  | ha   | 9  | hn   | 3.58 | 0.82 | 0.63 |
| 8  | hb#  | 9  | hn   | 3.61 | 0.74 | 0.52 |
| 8  | hn   | 9  | hn   | 2.61 | 0.51 | 0.36 |
| 9  | hg2# | 6  | hd21 | 4.49 | 1.02 | 0.81 |
| 9  | hg2# | 6  | hd22 | 4.1  | 0.9  | 0.66 |
| 9  | hg2# | 8  | hn   | 5.74 | 1.42 | 1.62 |
| 9  | ha   | 10 | hn   | 4.03 | 0.96 | 0.83 |
| 9  | hg2# | 10 | hn   | 5.82 | 1.44 | 1.7  |
| 9  | hb   | 11 | hg#  | 3.76 | 0.87 | 0.9  |
| 9  | hb   | 11 | hn   | 4.32 | 1.05 | 1.01 |
| 10 | ha1  | 5  | hh2  | 4.55 | 1.12 | 1.37 |
| 10 | ha2  | 5  | he1  | 4.2  | 1.01 | 1.13 |
| 10 | ha2  | 5  | hh2  | 3.65 | 0.84 | 0.85 |
| 10 | ha2  | 5  | hz2  | 3.42 | 0.77 | 0.77 |
| 10 | hn   | 9  | hn   | 2.26 | 0.36 | 0.3  |
| 10 | ha1  | 11 | hn   | 3.98 | 0.94 | 0.81 |
| 10 | ha2  | 11 | hn   | 3.46 | 0.78 | 0.58 |
| 10 | hn   | 11 | hn   | 2.63 | 0.52 | 0.36 |
| 11 | ha   | 5  | hz3  | 3.64 | 0.9  | 0.85 |
| 11 | ha   | 12 | hd1  | 3.85 | 0.9  | 0.94 |
| 11 | hb#  | 12 | hn   | 3.22 | 0.69 | 0.38 |

|    |      |    |     |      |      |      |
|----|------|----|-----|------|------|------|
| 11 | hg#  | 12 | hn  | 4.25 | 1.03 | 1.16 |
| 12 | hb1  | 3  | he1 | 5.31 | 1.36 | 2.17 |
| 12 | hb1  | 3  | he3 | 4.14 | 1    | 1.1  |
| 12 | hb1  | 3  | hz3 | 5.18 | 1.32 | 2    |
| 12 | hb2  | 3  | he1 | 5.1  | 1.3  | 1.91 |
| 12 | hb2  | 3  | he3 | 5.02 | 1.27 | 1.81 |
| 12 | hb2  | 3  | hz2 | 3.79 | 0.88 | 0.92 |
| 12 | hb1  | 4  | hn  | 5.41 | 1.4  | 2.11 |
| 12 | he3  | 4  | hn  | 4.14 | 1    | 1.1  |
| 12 | ha   | 5  | ha  | 3.01 | 0.64 | 0.45 |
| 12 | ha   | 5  | he3 | 4.37 | 1.07 | 1.24 |
| 12 | hd1  | 5  | hz3 | 3.48 | 0.78 | 0.99 |
| 12 | hz3  | 5  | hn  | 3.97 | 0.94 | 1    |
| 12 | ha   | 13 | hn  | 2.36 | 0.43 | 0.32 |
| 12 | hb1  | 13 | hn  | 4.12 | 0.99 | 0.88 |
| 12 | hb2  | 13 | hn  | 5.22 | 1.34 | 1.85 |
| 12 | he3  | 13 | hn  | 4.85 | 1.22 | 1.63 |
| 13 | ha   | 3  | hz3 | 3.32 | 0.73 | 0.73 |
| 13 | hn   | 4  | hn  | 3    | 0.72 | 0.52 |
| 13 | ha   | 14 | hn  | 2    | 0.1  | 0.35 |
| 13 | hb   | 14 | hn  | 2.87 | 0.59 | 0.41 |
| 13 | hg2# | 14 | hn  | 4.09 | 0.9  | 0.66 |
| 14 | hb1  | 1  | hb# | 4.36 | 1.05 | 0.96 |
| 14 | hb1  | 1  | hd# | 4.77 | 1.18 | 1.24 |
| 14 | ha   | 2  | hn  | 4.94 | 1.25 | 1.52 |
| 14 | he3  | 2  | hn  | 4.57 | 1.13 | 1.39 |
| 14 | ha   | 3  | he3 | 4.38 | 1.07 | 1.25 |
| 14 | hb2  | 3  | hz3 | 4.32 | 1.05 | 1.21 |
| 14 | hz3  | 3  | hn  | 3.86 | 0.91 | 0.95 |
| 14 | ha   | 4  | hn  | 4.09 | 0.98 | 0.87 |
| 14 | ha   | 15 | hn  | 2.38 | 0.44 | 0.32 |
| 14 | hb1  | 15 | hn  | 4.41 | 1.08 | 1.07 |
| 14 | hb2  | 15 | hn  | 4.59 | 1.14 | 1.21 |
| 14 | he3  | 15 | hn  | 4.12 | 0.99 | 1.08 |
| 15 | ha   | 16 | hn  | 2.22 | 0.32 | 0.3  |
| 15 | hb#  | 16 | hn  | 3.45 | 0.78 | 0.78 |
| 15 | hg#  | 16 | hn  | 4.4  | 1.06 | 0.98 |
| 16 | ha   | 1  | hb# | 4.69 | 1.15 | 1.18 |
| 16 | ha   | 2  | hn  | 4.95 | 1.25 | 1.54 |

Table 7. The distance restraints employed in generating the NMR ensemble of HP7

| Residue1 | Proton | Residue 2 | Proton | d    | d-   | d+   |
|----------|--------|-----------|--------|------|------|------|
| 1        | hb#    | 10        | he3    | 2.86 | 0.49 | 0.81 |
| 1        | hb#    | 10        | hb#    | 3.32 | 0.61 | 0.71 |
| 1        | hd#    | 10        | he3    | 3.41 | 0.66 | 0.97 |
| 1        | hd#    | 10        | hb#    | 3.43 | 0.65 | 0.74 |
| 1        | ha     | 10        | he3    | 3.77 | 0.78 | 0.9  |
| 1        | ha     | 11        | hn     | 3.85 | 0.8  | 0.74 |
| 1        | ha     | 1         | hb#    | 2.94 | 0.51 | 0.63 |
| 1        | ha     | 2         | hn     | 2.16 | 0.26 | 0.29 |
| 1        | hb#    | 2         | hn     | 3.05 | 0.55 | 0.66 |
| 2        | ha     | 10        | he3    | 3.24 | 0.61 | 0.71 |
| 2        | hn     | 11        | hn     | 2.7  | 0.44 | 0.38 |
| 2        | hb     | 11        | hn     | 3.7  | 0.75 | 0.68 |
| 3        | hz3    | 10        | hd1    | 2.88 | 0.49 | 0.82 |
| 3        | ha     | 10        | he3    | 3.06 | 0.55 | 0.66 |
| 3        | ha     | 10        | hn     | 4.01 | 0.85 | 0.82 |
| 3        | ha     | 11        | hn     | 3.49 | 0.69 | 0.59 |
| 3        | hb1    | 3         | hn     | 2.37 | 0.34 | 0.32 |
| 3        | hb1    | 3         | hd1    | 2.38 | 0.34 | 0.52 |
| 3        | ha     | 3         | he3    | 3.19 | 0.59 | 0.7  |
| 3        | ha     | 4         | hn     | 2.13 | 0.23 | 0.28 |
| 3        | hb2    | 4         | hn     | 3.68 | 0.75 | 0.67 |
| 3        | hb1    | 4         | hn     | 3.96 | 0.84 | 0.8  |
| 3        | hb1    | 5         | hd1    | 3.85 | 0.8  | 0.74 |
| 4        | ha     | 5         | hd2    | 2.23 | 0.29 | 0.3  |
| 4        | ha     | 5         | hd1    | 2.35 | 0.33 | 0.31 |
| 4        | ha     | 6         | hn     | 3.44 | 0.67 | 0.58 |
| 4        | hb1    | 7         | hn     | 3.3  | 0.63 | 0.53 |
| 4        | hb1    | 8         | hn     | 3.48 | 0.69 | 0.59 |
| 4        | hb1    | 9         | hn     | 3.08 | 0.56 | 0.47 |
| 4        | hn     | 9         | hn     | 3.35 | 0.64 | 0.54 |
| 4        | hb2    | 9         | hn     | 3.73 | 0.77 | 0.69 |
| 5        | hd1    | 3         | hd1    | 2.71 | 0.44 | 0.58 |
| 5        | hb1    | 3         | he1    | 2.85 | 0.49 | 0.61 |
| 5        | ha     | 3         | hd1    | 3.17 | 0.59 | 0.69 |
| 5        | hd2    | 3         | hd1    | 3.46 | 0.68 | 0.78 |
| 5        | hd1    | 3         | he1    | 3.66 | 0.74 | 0.86 |
| 5        | hb2    | 3         | hd1    | 3.89 | 0.81 | 0.96 |
| 5        | hd1    | 4         | hn     | 4.05 | 0.86 | 0.84 |
| 5        | hd2    | 4         | hn     | 4.13 | 0.89 | 0.89 |
| 5        | hd2    | 6         | hn     | 2.7  | 0.44 | 0.38 |
| 5        | hb2    | 6         | hn     | 3.15 | 0.58 | 0.48 |
| 5        | hd1    | 6         | hn     | 3.45 | 0.67 | 0.58 |



|    |      |    |      |      |      |      |
|----|------|----|------|------|------|------|
| 6  | hb#  | 4  | hd22 | 3.62 | 0.63 | 0.52 |
| 6  | hb#  | 4  | hd21 | 4.01 | 0.75 | 0.63 |
| 6  | hb#  | 7  | hn   | 3.35 | 0.54 | 0.45 |
| 7  | hg2# | 4  | hd22 | 3.34 | 0.54 | 0.45 |
| 7  | hg2# | 4  | hd21 | 3.64 | 0.63 | 0.52 |
| 7  | hn   | 6  | hn   | 2.4  | 0.34 | 0.32 |
| 7  | hg2# | 6  | hn   | 4.73 | 0.98 | 0.93 |
| 7  | hn   | 8  | hn   | 2.19 | 0.28 | 0.29 |
| 7  | ha   | 8  | hn   | 3.11 | 0.57 | 0.47 |
| 7  | hb   | 8  | hn   | 3.6  | 0.72 | 0.63 |
| 7  | hg2# | 8  | hn   | 4.24 | 0.82 | 0.71 |
| 7  | hb   | 9  | hn   | 3.7  | 0.76 | 0.68 |
| 7  | hg2# | 9  | hn   | 5.09 | 1.09 | 1.13 |
| 8  | ha2  | 3  | hh2  | 3.03 | 0.54 | 0.65 |
| 8  | ha1  | 3  | hh2  | 3.45 | 0.68 | 0.78 |
| 8  | ha2  | 3  | he1  | 3.47 | 0.68 | 0.79 |
| 8  | ha2  | 9  | hn   | 2.96 | 0.52 | 0.43 |
| 8  | ha1  | 9  | hn   | 3.29 | 0.63 | 0.53 |
| 9  | ha   | 10 | hn   | 2.12 | 0.22 | 0.28 |
| 9  | hb#  | 10 | hn   | 2.71 | 0.42 | 0.37 |
| 9  | ha   | 10 | hd1  | 3.43 | 0.67 | 0.77 |
| 9  | ha   | 10 | hb#  | 4.05 | 0.85 | 0.79 |
| 9  | ha   | 3  | hz3  | 2.96 | 0.52 | 0.64 |
| 9  | ha   | 3  | hh2  | 3.85 | 0.8  | 0.94 |
| 9  | hn   | 8  | hn   | 2.44 | 0.36 | 0.33 |
| 10 | hb1  | 10 | he3  | 2.6  | 0.39 | 0.56 |
| 10 | ha   | 11 | hn   | 2.23 | 0.29 | 0.3  |
| 10 | hb#  | 11 | hn   | 3.05 | 0.53 | 0.44 |
| 10 | hb#  | 2  | hn   | 3.92 | 0.8  | 0.73 |
| 10 | ha   | 3  | ha   | 2.6  | 0.41 | 0.36 |
| 10 | hz3  | 3  | hn   | 2.99 | 0.53 | 0.64 |
| 10 | he3  | 3  | hn   | 3    | 0.53 | 0.64 |
| 10 | he1  | 3  | hz3  | 3.17 | 0.59 | 0.89 |
| 10 | hn   | 3  | hz3  | 3.45 | 0.68 | 0.78 |
| 10 | ha   | 4  | hn   | 3.03 | 0.54 | 0.45 |
| 11 | hn   | 10 | he3  | 3.3  | 0.63 | 0.73 |
| 11 | ha   | 12 | hn   | 2.18 | 0.27 | 0.29 |
| 11 | hb   | 12 | hn   | 2.51 | 0.38 | 0.34 |
| 11 | hb   | 2  | hn   | 3.49 | 0.69 | 0.59 |
| 12 | ha   | 2  | hn   | 3.66 | 0.74 | 0.66 |

**Table 8. HP7, pH 6.0 buffer, 290K**

| Residue      | HN       | H $\alpha$   | H $\beta$ , H $\beta'$                                               | Others                                                                                                         |
|--------------|----------|--------------|----------------------------------------------------------------------|----------------------------------------------------------------------------------------------------------------|
| <b>Lys1</b>  | Exchange | 4.451        | 2.080, 1.901                                                         | $\gamma$ 1.418; $\delta$ 1.258; $\epsilon, \epsilon'$ 2.484, 2.391; $\epsilon$ NH3 Exchange                    |
| <b>Thr2</b>  | 9.239    | 4.870        | 4.043                                                                | $\gamma$ 1.243                                                                                                 |
| <b>Trp3</b>  | 9.049    | 4.091        | <b>2.648</b> , 1.840<br>$^3J_{\alpha\beta}$ : <b>11.8</b> , $\leq 4$ | $\epsilon$ 1 10.002; $\delta$ 1 6.631; $\epsilon$ 3 5.425<br>$\zeta$ 3 6.430; $\eta$ 2 6.910; $\zeta$ 2 7.274  |
| <b>Asn4</b>  | 7.457    | 4.920        | 3.059, 2.373                                                         | $\gamma$ NH2 7.19 ( $\delta$ 21), 7.22 ( $\delta$ 22)                                                          |
| <b>Pro5</b>  |          | 3.736        | 2.391, 1.987                                                         | $\gamma$ 2.037; $\delta, \delta'$ 3.796, 3.665                                                                 |
| <b>Ala6</b>  | 7.796    | 4.138        | 1.397                                                                |                                                                                                                |
| <b>Thr7</b>  | 6.864    | 4.262        | 4.116                                                                | $\gamma$ 0.997                                                                                                 |
| <b>Gly8</b>  | 7.970    | 3.734, 3.215 |                                                                      |                                                                                                                |
| <b>Lys9</b>  | 6.621    | 4.496        | 1.767, 1.420                                                         | $\gamma$ 1.256; $\delta, \delta'$ 1.671, 1.572; $\epsilon, \epsilon'$ 2.978; $\epsilon$ NH3 Exchange           |
| <b>Trp10</b> | 8.671    | 5.139        | <b>3.15</b> , 3.20<br>$^3J_{\alpha\beta}$ : <b>2.5</b> , 12.0        | $\epsilon$ 1 10.299; $\delta$ 1 7.564; $\epsilon$ 3 7.375;<br>$\zeta$ 3 7.154; $\eta$ 2 7.181; $\zeta$ 2 7.286 |
| <b>Thr11</b> | 9.402    | 4.645        | 4.330                                                                | $\gamma$ 1.222                                                                                                 |
| <b>Glu12</b> | 8.452    | 4.145        | 2.119, 1.952                                                         | $\gamma, \gamma'$ 2.317                                                                                        |

For the Trp residues the pro-S  $\beta$  proton (H $\beta$ 3) is listed first with the shifts and coupling constants shown in bold.

**Table 9. (K1R)-HP7, pH 6.0 buffer, 290K**

| Residue      | HN       | H $\alpha$   | H $\beta$ , H $\beta'$ | Others                                                                                                         |
|--------------|----------|--------------|------------------------|----------------------------------------------------------------------------------------------------------------|
| <b>Arg1</b>  | Exchange | 4.515        | 2.065, 1.942           | $\gamma$ 1.641; $\delta, \delta'$ 2.817, 2.737                                                                 |
| <b>Thr2</b>  | 9.264    | 4.909        | 4.053                  | $\gamma$ 1.256                                                                                                 |
| <b>Trp3</b>  | 9.103    | 4.107        | <b>2.629</b> , 1.805   | $\epsilon$ 1 9.982; $\delta$ 1 6.602; $\epsilon$ 3 5.419<br>$\zeta$ 3 6.431; $\eta$ 2 6.906; $\zeta$ 2 7.274   |
| <b>Asn4</b>  | 7.403    | 4.931        | 3.072, 2.379           | $\gamma$ NH2 7.23                                                                                              |
| <b>Pro5</b>  |          | 3.745        | 2.403, 1.989           | $\gamma$ 2.057; $\delta, \delta'$ 3.802, 3.689                                                                 |
| <b>Ala6</b>  | 7.799    | 4.138        | 1.404                  |                                                                                                                |
| <b>Thr7</b>  | 6.846    | 4.263        | 4.118                  | $\gamma$ 1.001                                                                                                 |
| <b>Gly8</b>  | 7.965    | 3.737, 3.215 |                        |                                                                                                                |
| <b>Lys9</b>  | 6.611    | 4.500        | 1.777, 1.424           | $\gamma$ 1.257; $\delta, \delta'$ 1.672, 1.579; $\epsilon, \epsilon'$ 2.982; $\epsilon$ NH3 Exchange           |
| <b>Trp10</b> | 8.668    | 5.146        | $\sim$ 3.16            | $\epsilon$ 1 10.183; $\delta$ 1 7.517; $\epsilon$ 3 7.358;<br>$\zeta$ 3 7.102; $\eta$ 2 7.149; $\zeta$ 2 7.243 |
| <b>Thr11</b> | 9.434    | 4.626        | 4.329                  | $\gamma$ 1.251                                                                                                 |
| <b>Glu12</b> | 8.480    | 4.157        | 2.145, 1.943           | $\gamma, \gamma'$ 2.335                                                                                        |

**Table 10. (G8A)-HP7, pH 6.0 buffer, 290K**

| Residue      | HN       | H $\alpha$ | H $\beta$ , H $\beta'$ | Others                                                                                                         |
|--------------|----------|------------|------------------------|----------------------------------------------------------------------------------------------------------------|
| <b>Lys1</b>  | Exchange | 4.435      |                        | $\gamma$ 1.406; $\delta$ 1.301; $\epsilon, \epsilon'$ 2.505, 2.401; $\epsilon$ NH3 Exchange                    |
| <b>Thr2</b>  | 9.216    | 4.838      | 4.047                  | $\gamma$ 1.243                                                                                                 |
| <b>Trp3</b>  | 9.075    | 4.176      | <b>2.699</b> , 1.964   | $\epsilon$ 1 10.100; $\delta$ 1 6.785; $\epsilon$ 3 5.419<br>$\zeta$ 3 6.430; $\eta$ 2 6.900; $\zeta$ 2 7.236  |
| <b>Asn4</b>  | 7.658    | 4.914      | 2.977, 2.385           | $\gamma$ NH2 7.26                                                                                              |
| <b>Pro5</b>  |          | 3.839      | 2.391, 1.987           | $\gamma$ 2.052; $\delta, \delta'$ 3.807, 3.701                                                                 |
| <b>Ala6</b>  | 7.857    | 4.147      | 1.402                  |                                                                                                                |
| <b>Thr7</b>  | 6.861    | 4.141      | 4.114                  | $\gamma$ 0.985                                                                                                 |
| <b>Ala8</b>  | 7.834    | 3.124      | 1.356                  |                                                                                                                |
| <b>Lys9</b>  | 6.577    | 4.417      | 1.690, 1.415           | $\gamma$ 1.295; $\delta, \delta'$ 1.665, 1.562; $\epsilon, \epsilon'$ 2.972; $\epsilon$ NH3 Exchange           |
| <b>Trp10</b> | 8.630    | 5.129      | ~3.20                  | $\epsilon$ 1 10.274; $\delta$ 1 7.556; $\epsilon$ 3 7.401;<br>$\zeta$ 3 7.154; $\eta$ 2 7.184; $\zeta$ 2 7.296 |
| <b>Thr11</b> | 9.311    | 4.628      | 4.316                  | $\gamma$ 1.212                                                                                                 |
| <b>Glu12</b> | 8.408    | 4.140      | 2.119, 1.946           | $\gamma, \gamma'$ 2.314                                                                                        |

**Table 11. (N4A)-HP7, pH 6.0 buffer, 298K**

| Residue      | HN       | H $\alpha$   | H $\beta$ , H $\beta'$ | Others                                                                                                         |
|--------------|----------|--------------|------------------------|----------------------------------------------------------------------------------------------------------------|
| <b>Lys1</b>  | Exchange | 4.208        | 1.888                  | $\gamma$ 1.497; $\delta$ 1.340; $\epsilon, \epsilon'$ 2.667; $\epsilon$ NH3 Exchange                           |
| <b>Thr2</b>  | Exchange | 4.557        | 4.083                  | $\gamma$ 1.228                                                                                                 |
| <b>Trp3</b>  | 8.704    | 4.411        | 3.013, 2.664           | $\epsilon$ 1 10.040; $\delta$ 1 6.979; $\epsilon$ 3 6.746;<br>$\zeta$ 3 6.837; $\eta$ 2 7.100; $\zeta$ 2 7.395 |
| <b>Ala4</b>  | 7.791    | 4.544        | 1.165                  |                                                                                                                |
| <b>Pro5</b>  |          | 3.955        | 2.292, 1.883           | $\gamma$ 1.950; $\delta, \delta'$ 3.575, 3.474                                                                 |
| <b>Ala6</b>  | 8.361    | 4.216        | 1.387                  |                                                                                                                |
| <b>Thr7</b>  | 7.533    | 4.312        | 4.184                  | $\gamma$ 1.135                                                                                                 |
| <b>Gly8</b>  | 8.111    | 3.841, 3.605 |                        |                                                                                                                |
| <b>Lys9</b>  | 7.439    | 4.359        | 1.694, 1.538           | $\gamma$ 1.246; $\delta, \delta'$ 1.587; $\epsilon, \epsilon'$ 2.923; $\epsilon$ NH3 Exchange                  |
| <b>Trp10</b> | 8.350    | 4.910        | 3.23                   | $\epsilon$ 1 10.182; $\delta$ 1 7.359; $\epsilon$ 3 7.528;<br>$\zeta$ 3 7.142; $\eta$ 2 7.201; $\zeta$ 2 7.402 |
| <b>Thr11</b> | 8.465    | 4.434        | 4.199                  | $\gamma$ 1.122                                                                                                 |
| <b>Glu12</b> | 8.060    | 4.086        | 2.053, 1.903           | $\gamma, \gamma'$ 2.244                                                                                        |

**Table 12. HP7 (-4), pH 6.0 buffer, 290K**

| Residue     | HN    | H $\alpha$   | H $\beta$ , H $\beta'$ | Others                                                                                                         |
|-------------|-------|--------------|------------------------|----------------------------------------------------------------------------------------------------------------|
| <b>Trp1</b> | 8.325 | 4.222        | 2.928, 2.751           | $\epsilon$ 1 10.082; $\delta$ 1 6.964; $\epsilon$ 3 6.939;<br>$\zeta$ 3 6.913; $\eta$ 2 7.128; $\zeta$ 2 7.394 |
| <b>Asn2</b> | 7.853 | 4.852        | 3.013, 2.451           | $\gamma$ NH2 7.39 ( $\delta$ 21), 7.12 ( $\delta$ 22)                                                          |
| <b>Pro3</b> |       | 3.959        | 2.309, 1.944           | $\gamma$ 1.965; $\delta, \delta'$ 3.691, 3.550                                                                 |
| <b>Ala4</b> | 8.013 | 4.234        | 1.413                  |                                                                                                                |
| <b>Thr5</b> | 7.386 | 4.306        | 4.204                  | $\gamma$ 1.107                                                                                                 |
| <b>Gly6</b> | 8.176 | 3.867, 3.626 |                        |                                                                                                                |
| <b>Lys7</b> | 7.541 | 4.332        | 1.696, 1.521           | $\gamma$ 1.188; $\delta, \delta'$ 1.560; $\epsilon, \epsilon'$ 2.904;<br>$\epsilon$ NH3 Exchange               |
| <b>Trp8</b> | 8.355 | 4.518        | 3.225, 3.132           | $\epsilon$ 1 10.199; $\delta$ 1 7.318; $\epsilon$ 3 7.512;<br>$\zeta$ 3 7.147; $\eta$ 2 7.229; $\zeta$ 2 7.433 |

**Table 13. Ac-NPATGK-NH<sub>2</sub>, pH 6.0 buffer, 290K**

| Residue     | HN    | H $\alpha$ | H $\beta$ , H $\beta'$ | Others                                                                                                                    |
|-------------|-------|------------|------------------------|---------------------------------------------------------------------------------------------------------------------------|
| <b>Asn1</b> | 8.458 | 4.948      | 2.850, 2.660           | $\gamma$ NH2 7.70 ( $\delta$ 21), 7.04 ( $\delta$ 22)                                                                     |
| <b>Pro2</b> |       | 4.424      | 2.310, 1.964           | $\gamma$ 2.024; $\delta, \delta'$ 3.854, 3.732                                                                            |
| <b>Ala3</b> | 8.480 | 4.354      | 1.414                  |                                                                                                                           |
| <b>Thr4</b> | 8.072 | 4.321      | 4.257                  | $\gamma$ 1.229                                                                                                            |
| <b>Gly5</b> | 8.435 | 3.985      |                        |                                                                                                                           |
| <b>Lys6</b> | 8.267 | 4.301      | 1.872, 1.750           | $\gamma$ 1.430; $\delta, \delta'$ 1.680; $\epsilon, \epsilon'$ 2.990;<br>$\epsilon$ NH3 Exchange<br>term-COHN2 7.71, 7.19 |

**Table 14. HP6, pH 6.0 buffer, 290K**

| Residue       | HN       | H $\alpha$   | H $\beta$ , H $\beta'$ | Others                                                                                                       |
|---------------|----------|--------------|------------------------|--------------------------------------------------------------------------------------------------------------|
| <b>Lys 1</b>  | Exchange | 4.002        | 1.912                  | $\gamma, \gamma'$ 1.395; $\delta, \delta'$ 1.703; $\epsilon, \epsilon'$ 2.992                                |
| <b>Tyr 2</b>  | 8.890    | 5.152        | 2.734                  | $\delta$ 6.886; $\epsilon$ 6.676                                                                             |
| <b>Thr 3</b>  | 9.110    | 4.709        | 3.995                  | $\gamma$ 1.116                                                                                               |
| <b>Trp 4</b>  | 8.699    | 4.631        | 2.942, 2.213           | $\epsilon$ 1 9.942; $\delta$ 1 6.834; $\epsilon$ 3 5.994<br>$\zeta$ 3 6.639; $\eta$ 2 6.989; $\zeta$ 2 7.236 |
| <b>Ser 5</b>  | 8.426    | 4.352        | 3.572                  |                                                                                                              |
| <b>Asn 6</b>  | 9.018    | 4.205        | 2.875, 2.581           | $\gamma$ NH2 7.511 ( $\delta$ 21), 6.868( $\delta$ 22)                                                       |
| <b>Gly 7</b>  | 7.558    | 3.885, 3.350 |                        |                                                                                                              |
| <b>Lys 8</b>  | 7.001    | 4.273        | 1.767                  | $\gamma, \gamma'$ 1.202; $\delta, \delta'$ 1.608; $\epsilon, \epsilon'$ 2.944                                |
| <b>Trp 9</b>  | 8.530    | 5.020        | 3.025, 2.935           | $\epsilon$ 1 10.06; $\delta$ 1 7.28; $\epsilon$ 3 7.300<br>$\zeta$ 3 7.103; $\eta$ 2 7.179; $\zeta$ 2 7.28   |
| <b>Thr 10</b> | 9.203    | 4.647        | 4.066                  | $\gamma$ 1.167                                                                                               |
| <b>Val 11</b> | 8.417    | 4.190        | 1.906                  | $\gamma, \gamma'$ 0.816                                                                                      |
| <b>Glu 12</b> | 8.300    | 4.223        | 2.023, 1.840           | $\gamma, \gamma'$ 2.290                                                                                      |

**Table 15. (T3V)-HP6 , pH 6.0 buffer, 290K**

| Residue       | HN       | H $\alpha$   | H $\beta$ , H $\beta'$ | Others                                                                                                       |
|---------------|----------|--------------|------------------------|--------------------------------------------------------------------------------------------------------------|
| <b>Lys 1</b>  | Exchange | 4.015        | 1.931                  | $\gamma, \gamma'$ 1.395; $\delta, \delta'$ 1.711; $\epsilon, \epsilon'$ 2.976                                |
| <b>Tyr 2</b>  | 8.895    | 5.278        | 2.831, 2.724           | $\delta$ 6.921; $\epsilon$ 6.694                                                                             |
| <b>Val 3</b>  | 9.411    | 4.575        | 2.053                  | $\gamma, \gamma'$ 0.893, 0.845                                                                               |
| <b>Trp 4</b>  | 8.883    | 4.557        | <b>2.865</b> , 1.987   | $\epsilon_1$ 9.904; $\delta_1$ 6.808; $\epsilon_3$ 5.660<br>$\zeta_3$ 6.545; $\eta_2$ 6.947; $\zeta_2$ 7.229 |
| <b>Ser 5</b>  | 8.457    | 4.344        | 3.536                  |                                                                                                              |
| <b>Asn 6</b>  | 9.036    | 4.155        | 2.869, 2.544           | $\gamma\text{NH}_2$ 7.488 ( $\delta_{21}$ ), 6.829 ( $\delta_{22}$ )                                         |
| <b>Gly 7</b>  | 7.398    | 3.825, 3.261 |                        |                                                                                                              |
| <b>Lys 8</b>  | 6.782    | 4.209        | 1.650                  | $\gamma, \gamma'$ 1.186; $\delta, \delta'$ 1.592; $\epsilon, \epsilon'$ 2.944                                |
| <b>Trp 9</b>  | 8.492    | 5.149        | 3.011                  | $\epsilon_1$ 10.06; $\delta_1$ 7.361; $\epsilon_3$ 7.300<br>$\zeta_3$ 7.088; $\eta_2$ 7.185; $\zeta_2$ 7.242 |
| <b>Thr 10</b> | 9.429    | 4.74         | 4.104                  | $\gamma$ 1.181                                                                                               |
| <b>Val 11</b> | 8.367    | 4.352        | 1.899                  | $\gamma, \gamma'$ 0.790                                                                                      |
| <b>Glu 12</b> | 8.449    | 4.154        | 1.974, 1.78            | $\gamma, \gamma'$ 2.160                                                                                      |

**References**

- (1) Fesinmeyer, R. M.; Hudson, F. M.; Andersen, N. H. *J. Am. Chem. Soc.* **2004**, *126*, 7238-7243.
- (2) Cochran, A. G.; Skelton, N. J.; Starovasnik, M. A. *Proc. Natl. Acad. Sci. U. S. A.* **2001**, *98*, 5578-5583.
- (3) Xu, X. P.; Case, D. A. *J. Biomol. NMR* **2001**, *21*, 321-333.
- (4) Bundi, A.; Wüthrich, K. *Biopolymers* **1979**, *18*, 285-298; Merutka, G.; Dyson, H. J.; Wright, P. E. *J. Biomol. NMR* **1995**, *5*, 14-24; Wishart, D. S.; Bigam, C. G.; Holm, A.; Hodges, R. S.; Sykes, B. D. *J. Biomol. NMR* **1995**, *5*, 67-81.
